# Supplementary material for: Clinical characteristics of COVID-19 and active tuberculosis co-infection in an Italian reference hospital
Source: PubMed Central journal article supplement — Eur Respir J. 2020 Jul 30;56(1):2001708. doi: 10.1183/13993003.01708-2020 (PMC7263070; doi:10.1183/13993003.01708-2020), 2020-07-30

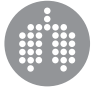

ERJ European Respiratory Journal Eur Respir J 0903-1936/1399-3003 European Respiratory Society 10.1183/13993003.01708-2020 ERJ-01708-2020 AGORA RESEARCH LETTER

Clinical characteristics of COVID-19 and active tuberculosis co-infection in an Italian reference hospital. C. STOCHINO ET AL. RESEARCH LETTER Clinical characteristics of COVID-19 and active TB co-infection

Stochino Claudia<sup>1</sup>, Villa Simone<sup>2</sup>, Zucchi Patrizia<sup>3</sup>, Parravicini Pierpaolo<sup>3</sup>, Gori Andrea<sup>2,4</sup>, Raviglione Mario Carlo<sup>2</sup>,

<sup>1</sup>Phthysiology Unit, Sondalo Hospital, ASST Valtellina e Alto Lario, Sondrio, Italy. <sup>2</sup>Centre for Multidisciplinary Research in Health Science, University of Milan, Milan, Italy. <sup>3</sup>Dept of Internal Medicine, ASST Valtellina e Alto Lario, Sondrio, Italy. <sup>4</sup>Infectious Diseases Unit, Dept of Internal Medicine, Fondazione IRCCS Ca' Granda Ospedale Maggiore Policlinico, Milan, Italy.

**Correspondence:** Simone Villa, Centre for Multidisciplinary Research in Health Science, University of Milan, Via Francesco Sforza 35, 20122, Milan, Italy. E-mail: simone.villa@unimi.it  
2020202056010052020250520202020

*To the Editor:*

Coronavirus disease 2019 (COVID-19), caused by the severe acute respiratory syndrome coronavirus 2 (SARS-CoV-2), emerged in Wuhan, China, in December 2019. In February 2020, an outbreak was detected in the Lombardy region of Italy, resulting in the first major outbreak outside Asia [1].

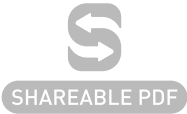

Supplement: ERJ-01708-2020.Shareable.pdf [file ERJ-01708-2020.Shareable.pdf]
